# Supplementary material
Source: PubMed Central journal article supplement (PMC5262636)
Supplement: NIHMS832632-supplement-1.pdf [file NIHMS832632-supplement-1.pdf]

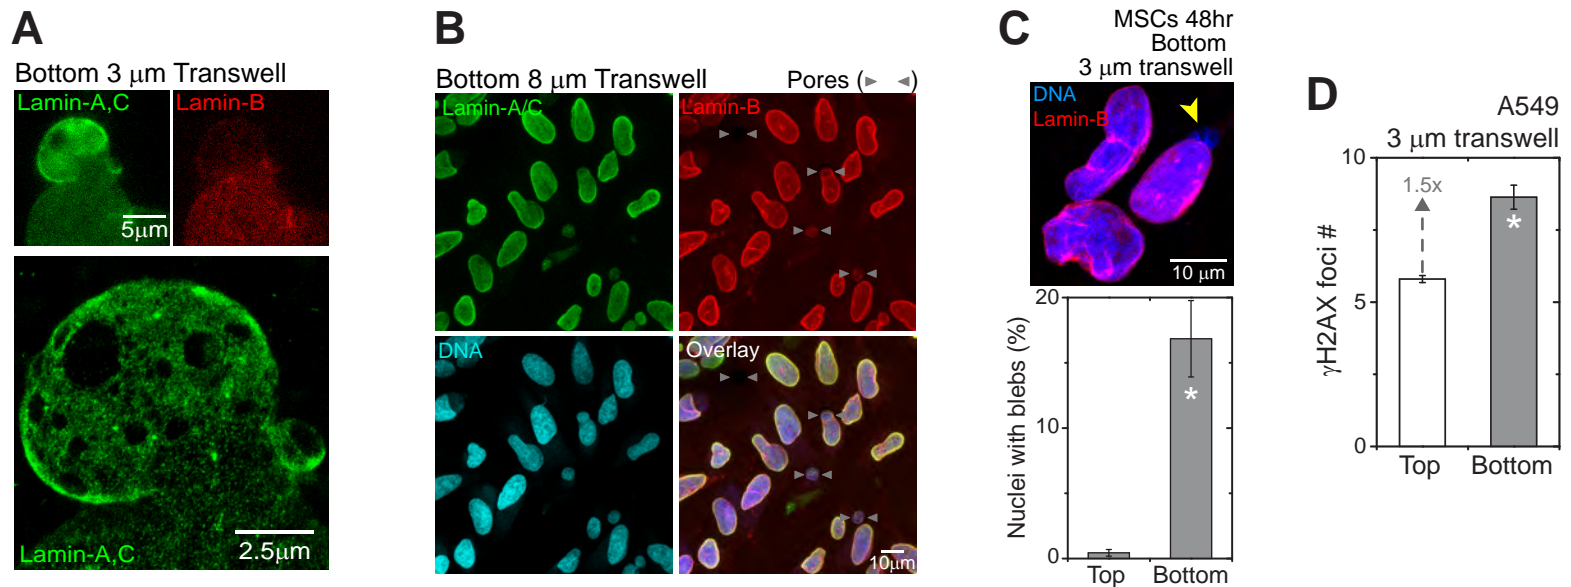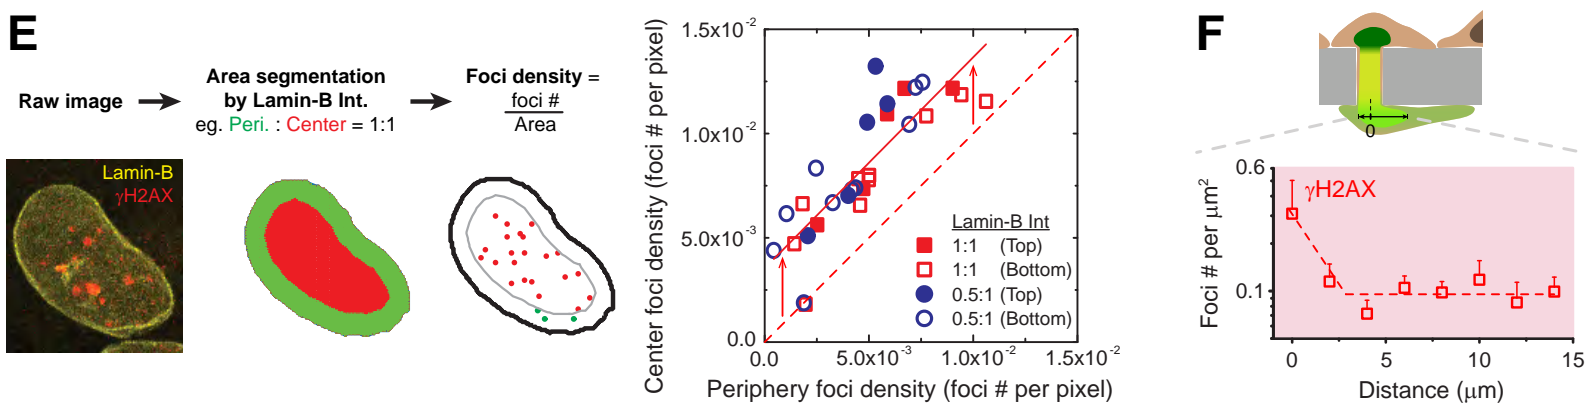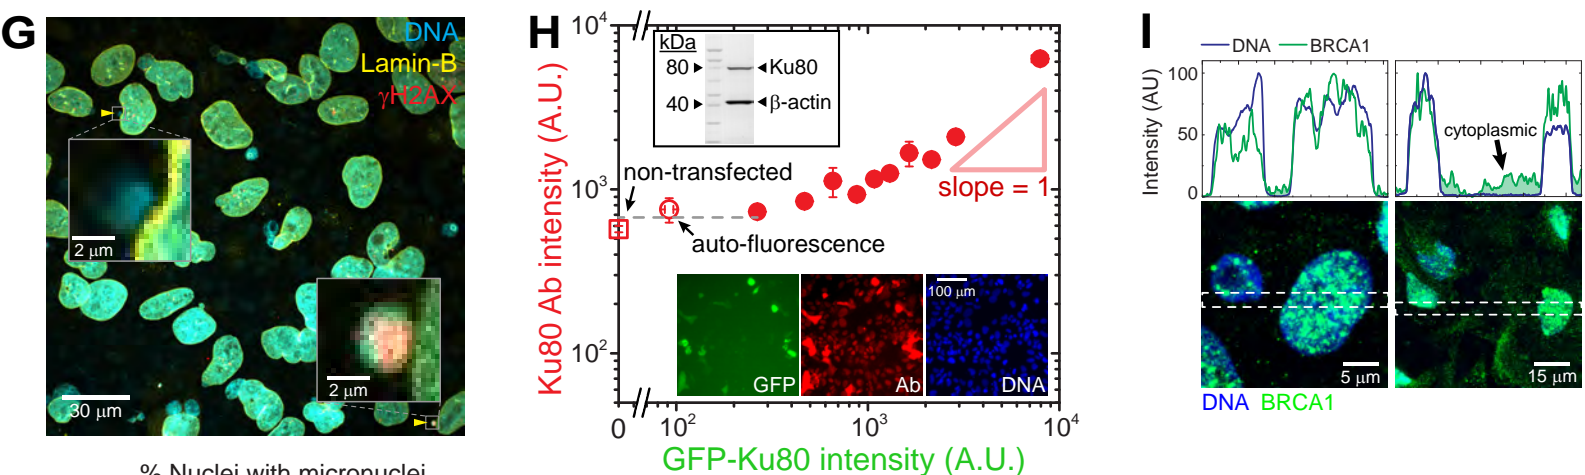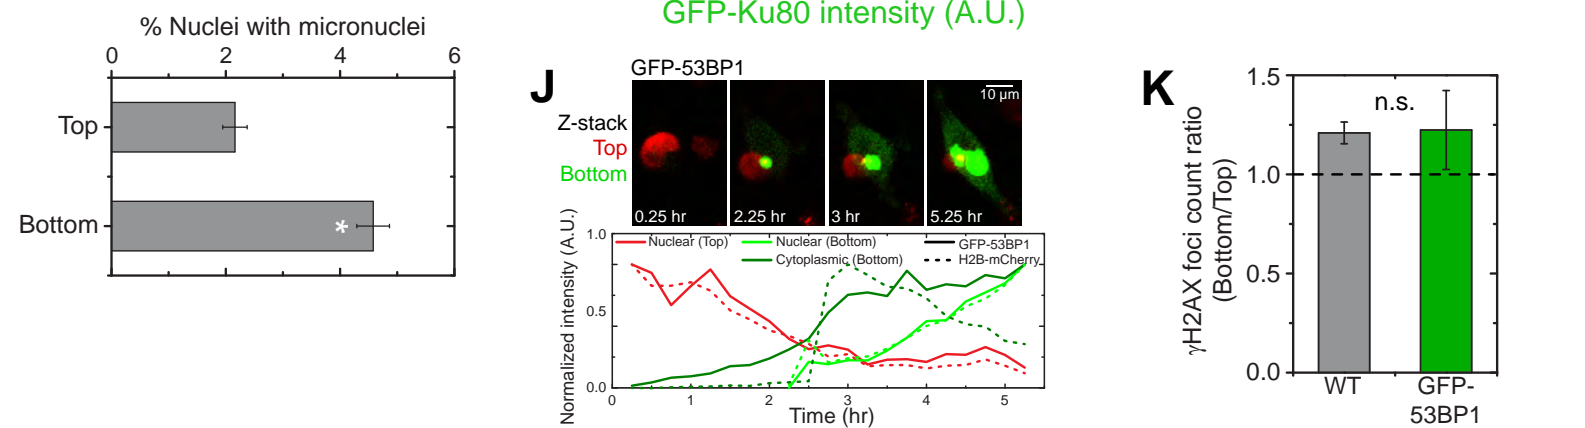

**Figure S1. Constricted migration also increases nuclear blebs in MSCs and DNA damage in A549 cells. DNA damage sites observed tend to be at the center of the nucleus, micronuclei number are slightly increased and BRCA1 mis-localize to cytoplasm. Overexpressed GFP-53BP1 also mis-localize to cytoplasm and does not rescue DNA damage post migration. Migration through larger pores does not perturb nuclear morphology. Related to Figure 1 and Figure 2.** (A) Super resolution imaging of a nuclear bleb after constricted migration reveals a dilated meshwork of Lamin-A,C. (B) Cells that have migrated through large 8  $\mu\text{m}$  pores do not exhibit major nuclear damage. (C) Migration of hMSCs through 3  $\mu\text{m}$  pores leads to an increase in nuclear blebs positive nuclei, which is absent of lamin-B ( $\geq 100$  nuclei per conditions,  $*p < 0.05$ ). (D) Migration of A549, human lung carcinoma cell line, through 3 $\mu\text{m}$  pores also leads to an increase in  $\gamma\text{H2AX}$  foci count ( $\geq 100$  nuclei per conditions,  $n \geq 3$  expts,  $*p < 0.05$ ). (E) Nuclear area was segmented to periphery and center by lamin-B integrated intensity.  $\gamma\text{H2AX}$  foci count reveals that foci tend to be located at the center of the nucleus ( $n = 15$  nuclei). (F) DNA damage foci are evident near the pore at bottom and are relatively homogeneous elsewhere ( $n = 14$  nuclei). (G) Although higher number of micronuclei were found after 3  $\mu\text{m}$  pore migration, it is relatively rare compared to the pre-dominant nuclear blebs ( $\geq 3$  transwells,  $n \geq 3$  expts,  $*p < 0.05$ ). Some of the micronuclei stained for  $\gamma\text{H2AX}$ , indicative of DNA damage. (H) Specificity of Ku80 antibody was validated by immuno-staining U2OS cells with GFP-Ku80 over-expression. At lower GFP intensity level, Ku80 antibody intensity is statistically the same as the non-transfected cells (dashed line). At higher over-expression level, Ku80 antibody intensity increases proportionally to GFP intensity ( $\geq 1600$  cells). (Inset) Immunoblot of Ku80 and  $\beta$ -actin shows clear bands only at the corresponding molecular weight, again suggesting specificity of the antibodies. (I) Representative images and intensity profiles showing increased BRCA1 mis-localization to the cytoplasm (green shaded) after migration through 3  $\mu\text{m}$  pores at the bottom of the transwell. (J) Live imaging of GFP-53BP1 and H2B-mCherry-overexpressing U2OS cells reveals nuclear rupture—with leakage of GFP/m-Cherry into the cytoplasm. H2B-mCherry signal re-localized rapidly into the nucleus ( $< 3$  hours)[S1]. (K) Over-expression of GFP-53BP1 in U2OS cells does not rescue the migration-induced DNA damage, as shown by the  $\gamma\text{H2AX}$  foci ratio ( $\geq 100$  cells per conditions,  $n \geq 2$  expts).

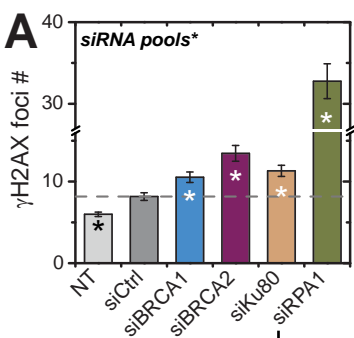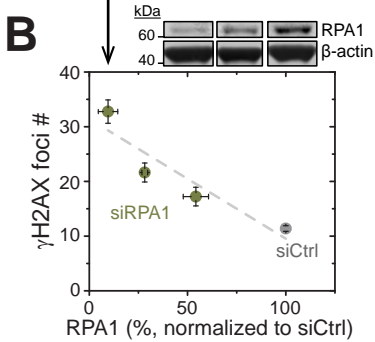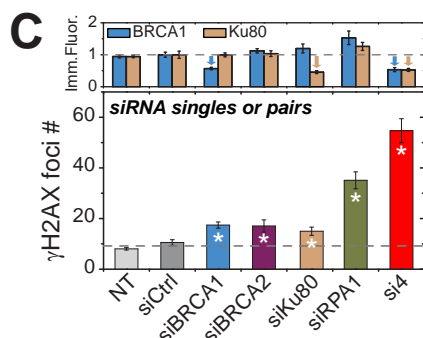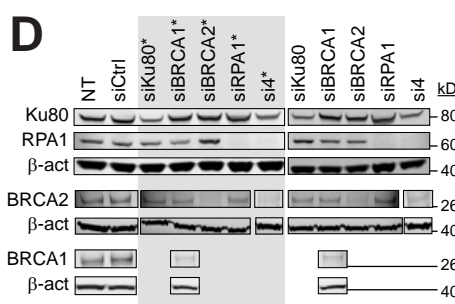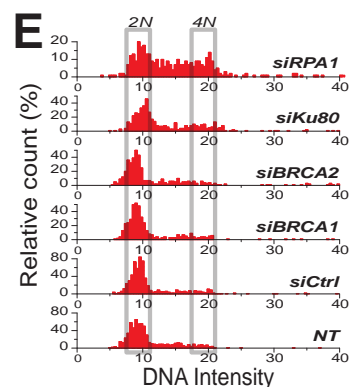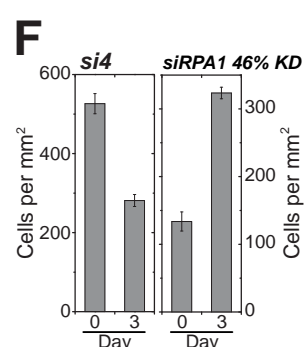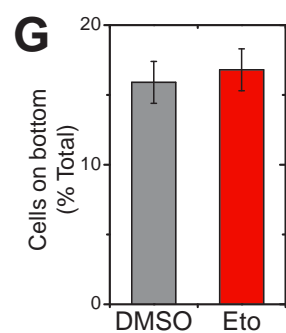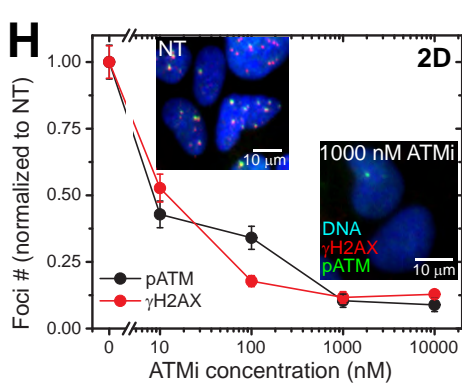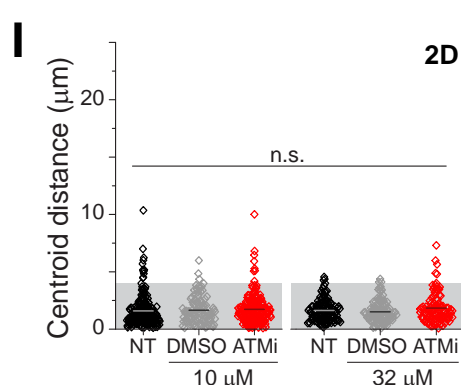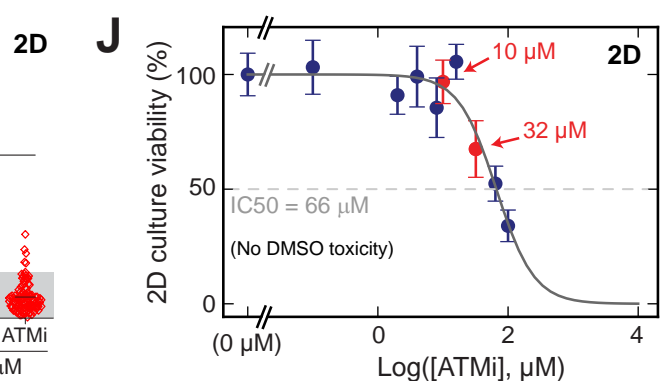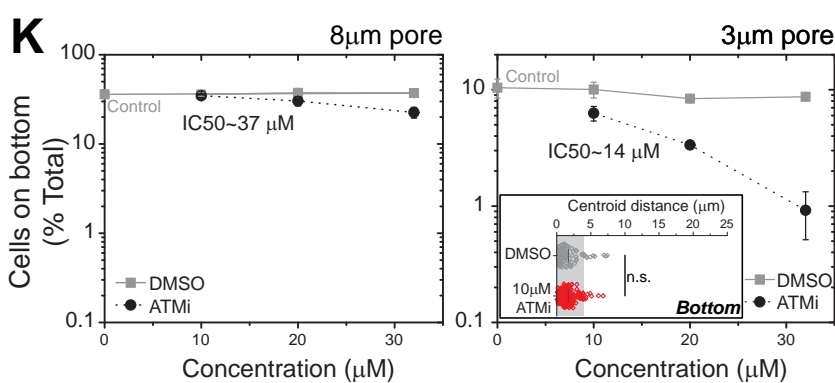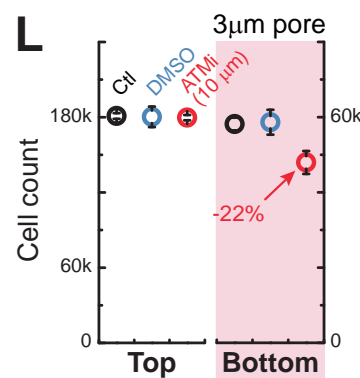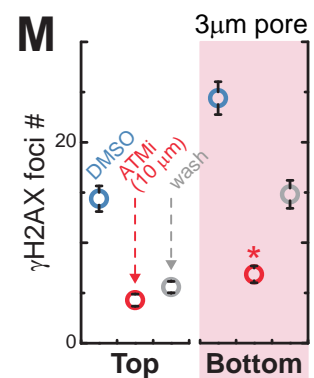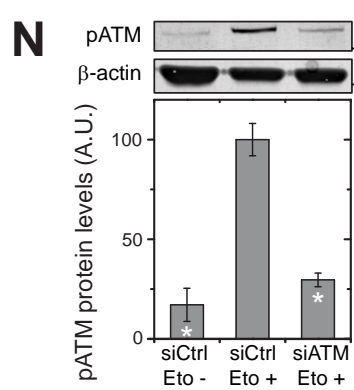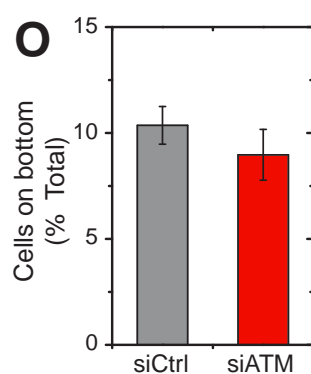

**Figure S2. ATMi kills cell on 2D culture at high dosage and after migration with lower dosage. Etoposide-induced DNA damage does not impede migration. Knockdown of some DNA repair factors are titratable and lead to accumulation of DNA damage, increase of DNA content and some cell death. Related to Figure 3. (A)** Treating U2OS with single siRNA pool of BRCA1, BRCA2, RPA1 and Ku80 leads to increased  $\gamma$ H2AX foci count. However, the most significant effect was observed in the siRPA1 group ( $\geq 150$  nuclei per conditions,  $*p < 0.05$  compared to siCtrl). **(B)** Depletion of siRPA1 is titratable by using less siRNAs, the levels of knockdown are reflected by the  $\gamma$ H2AX foci count, majority of the nuclei have distinctive  $\gamma$ H2AX foci, while minority of nuclei have “global”  $\gamma$ H2AX staining, where the whole nucleoplasmic region is positive for  $\gamma$ H2AX ( $\geq 150$  nuclei per conditions,  $n \geq 3$  expts,  $*p < 0.05$  compared to siCtrl). **(C)** In order to validate siRNAs specificity, another set of siRNAs with different sequences was purchased from a different source (see Methods). Most of the siRNAs comprise of a single sequence, except for siKu80 that contains a pair of siRNA sequences. Specificity of the knockdown was illustrated by the upper plot, where BRCA1 and Ku80 depletion was only observed in siBRCA1 and siKu80 samples, respectively, in addition to the si4 sample. Indeed, the increase of  $\gamma$ H2AX foci count was also observed with these siRNAs ( $\geq 150$  nuclei per conditions,  $n = 2$  expts,  $*p < 0.05$  compared to siCtrl). **(D)** Specificity of the DNA repair factors depletion by siRNA treatments was confirmed by immuno-blots (\* for the siRNA singles and pairs used in Figure S2C). **(E)** Treating U2OS with single siRNA pools also leads to increased DNA content ( $\geq 150$  nuclei per conditions,  $n \geq 3$  expts,  $*p < 0.05$  compared to siCtrl, statistical comparison between distributions were done with KS test). **(F)** si4 treatment induces cell death within the 3 days of culture after treatment, but knockdown of RPA1 by 46% allows for cell growth ( $n \geq 3$  expts). **(G)** Exposing the cells to 10  $\mu$ M Etoposide does not impede the migration, even with the induced DNA damage (Figure 1H,  $n = 3$  transwell membranes). **(H, I)** Inhibition efficiency of ATMi was measured by foci counts for  $\gamma$ H2AX and phosphorylated ATM (pATM). Both  $\gamma$ H2AX and pATM foci can be seen in non-treated cells per representative image. Foci counts decreased  $\sim 50\%$  at 10 nM and plateau at 0.1 to 1  $\mu$ M ( $\geq 150$  nuclei per condition,  $n \geq 3$  expts). Comet assay did not show accumulation of DNA damage after ATMi treatment, even at very high drug 32  $\mu$ M concentrations ( $\geq 200$  nuclei per group,  $n = 3$  expts). **(J)** Colorimetric toxicity assay of ATMi treatment on U2OS 2D culture shows an IC50 of 66  $\mu$ M ( $n = 3$  expts). **(K)** The percentage of cells that migrated through the transwell in 24 hours is higher for 8  $\mu$ m pores than for 3  $\mu$ m pores, and is reduced only for very high doses of ATMi (10, 20 and 32  $\mu$ M), with 50% fewer cells (IC50) of 37 and 14  $\mu$ M for 8  $\mu$ m and 3  $\mu$ m pores, respectively. DMSO solvent control does not affect the migration ratios ( $\geq 3$  transwell each condition,  $n \geq 3$  expts). The inset shows 10  $\mu$ M ATMi during migration also does not cause more comet-detected DNA damage when compared to the corresponding DMSO group ( $\geq 200$  nuclei each condition,  $n \geq 3$  expts). **(L, M)** Inhibition with ATMi (10  $\mu$ M) of ATM kinase which phosphorylates H2AX (to make  $\gamma$ H2AX) during the 24 hrs of constricted migration decreases cell numbers on the Bottom but not the Top. The result is consistent with past evidence of migration-dependent cell death. For both Top and Bottom, ATMi strongly decreases  $\gamma$ H2AX, but more foci on Bottom are resistant ( $\geq 45$  nuclei per condition,  $n \geq 3$  expts,  $*p < 0.05$ ). **(N)** siATM treatment leads to a decrease of pATM in samples exposed to 10  $\mu$ M etoposide ( $n = 3$  western blots,  $*p < 0.05$  compared to siCtrl treated with etoposide). **(O)** siATM does not inhibit migration ( $n = 3$  transwell membranes).

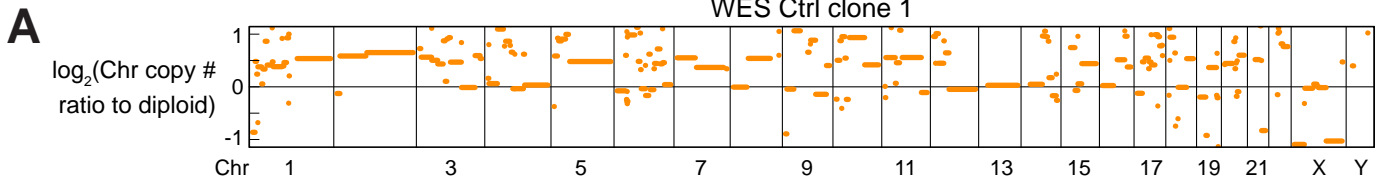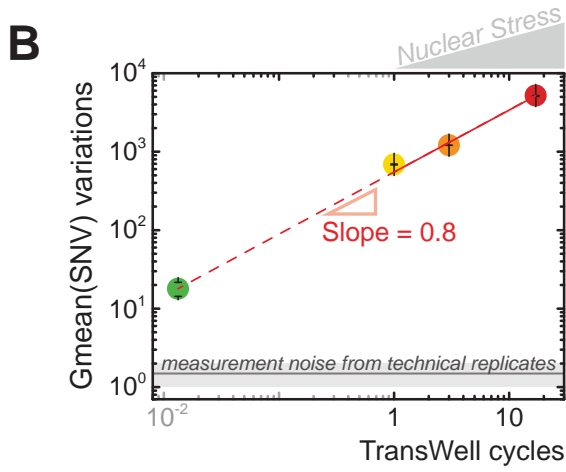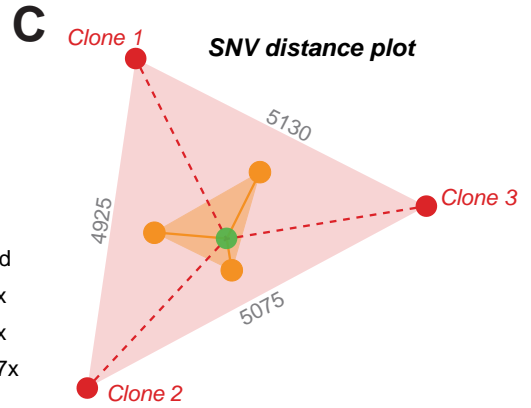

**D**

|                | Control Clone1 | Control Clone2 | Control Clone3 | Control Clone4 | Control Clone5 | Control Clone6 | TW3 Clone1 | TW3 Clone2 | TW3 Clone3 | TW17 Clone1 | TW17 Clone2 | TW17 Clone3 |
|----------------|----------------|----------------|----------------|----------------|----------------|----------------|------------|------------|------------|-------------|-------------|-------------|
| Control-Clone1 | 0              | 36             | 0              | 32             | 13             | 2              | 1043       | 394        | 866        | 2455        | 2508        | 2626        |
| Control-Clone2 | 36             | 0              | 36             | 32             | 13             | 4              | 1079       | 430        | 902        | 2491        | 2544        | 2662        |
| Control-Clone3 | 0              | 36             | 0              | 32             | 13             | 2              | 1043       | 394        | 866        | 2455        | 2508        | 2626        |
| Control-Clone4 | 32             | 32             | 32             | 0              | 21             | 34             | 1075       | 426        | 898        | 2455        | 2529        | 2660        |
| Control-Clone5 | 13             | 13             | 13             | 21             | 0              | 15             | 1056       | 407        | 879        | 2476        | 2508        | 2641        |
| Control-Clone6 | 2              | 4              | 2              | 34             | 15             | 0              | 1045       | 398        | 868        | 2489        | 2523        | 2626        |
| TW3-Clone1     | 1043           | 1079           | 1043           | 1075           | 1056           | 1045           | 0          | 1433       | 1907       | 3494        | 3547        | 3665        |
| TW3-Clone2     | 394            | 430            | 394            | 426            | 407            | 398            | 1433       | 0          | 1258       | 2845        | 2592        | 3016        |
| TW3-Clone3     | 866            | 902            | 866            | 898            | 879            | 868            | 1907       | 1258       | 0          | 3319        | 1746        | 3462        |
| *TW17-Clone1   | 2455           | 2491           | 2455           | 2455           | 2476           | 2489           | 3494       | 2845       | 3319       | 0           | 4925        | 5075        |
| *TW17-Clone2   | 2508           | 2544           | 2508           | 2529           | 2508           | 2523           | 3547       | 2592       | 1746       | 4925        | 0           | 5130        |
| *TW17-Clone3   | 2626           | 2662           | 2626           | 2660           | 2641           | 2626           | 3665       | 3016       | 3462       | 5075        | 5130        | 0           |

**E** Expt 1

|                             | Clone 1 | Clone 2 | Clone 3 | Clone 4 | Clone 5 | Clone 6 |
|-----------------------------|---------|---------|---------|---------|---------|---------|
| Pre-migration clone (Gain)  | 0       | 0       | 24      | 38      | 53      | 72      |
| Pre-migration clone (Loss)  | 0       | 0       | 1       | 0       | 1       | 2       |
| Pre-migration clone (Total) | 0       | 0       | 25      | 38      | 54      | 74      |
| Clone 1                     | 0       | 0       | 25      | 38      | 55      | 74      |
| Clone 2                     | 0       | 0       | 25      | 38      | 55      | 74      |
| Clone 3                     | 25      | 25      | 0       | 63      | 80      | 75      |
| Clone 4                     | 38      | 38      | 63      | 0       | 93      | 154     |
| Clone 5                     | 55      | 55      | 80      | 93      | 0       | 128     |
| Clone 6                     | 74      | 74      | 75      | 154     | 128     | 0       |

**F** Expt 2

|                      | TW3 clone 1 | TW3 clone 2 | TW3 clone 3 |
|----------------------|-------------|-------------|-------------|
| Ctrl clone 1 (Gain)  | 15          | 27          | 15          |
| Ctrl clone 1 (Loss)  | 4           | 0           | 5           |
| Ctrl clone 1 (Total) | 19          | 27          | 20          |
| TW3 clone 1          | 0           | 49          | 49          |
| TW3 clone 2          | 49          | 0           | 58          |
| TW3 clone 3          | 49          | 58          | 0           |

**G** Expt 3

|                      | 3 μm clone 1 | 3 μm clone 2 | 3 μm clone 3 | 3 μm clone 4 |
|----------------------|--------------|--------------|--------------|--------------|
| Ctrl clone 1 (Gain)  | 0            | 6            | 10           | 28           |
| Ctrl clone 1 (Loss)  | 0            | 0            | 0            | 0            |
| Ctrl clone 1 (Total) | 0            | 6            | 10           | 28           |
| 3 μm clone 1         | 0            | 7            | 21           | 30           |
| 3 μm clone 2         | 7            | 0            | 10           | 37           |
| 3 μm clone 3         | 21           | 10           | 0            | 35           |
| 3 μm clone 4         | 30           | 37           | 35           | 0            |

|                      | 8 μm clone 1 | 8 μm clone 2 | 8 μm clone 3 | 8 μm clone 4 | 8 μm clone 5 | 8 μm clone 6 |
|----------------------|--------------|--------------|--------------|--------------|--------------|--------------|
| Ctrl clone 1 (Gain)  | 0            | 0            | 0            | 0            | 8            | 17           |
| Ctrl clone 1 (Loss)  | 0            | 0            | 0            | 0            | 0            | 0            |
| Ctrl clone 1 (Total) | 0            | 0            | 0            | 0            | 8            | 17           |
| 8 μm clone 1         | 0            | 0            | 0            | 0            | 8            | 20           |
| 8 μm clone 2         | 0            | 0            | 0            | 0            | 9            | 17           |
| 8 μm clone 3         | 0            | 0            | 0            | 0            | 9            | 19           |
| 8 μm clone 4         | 0            | 0            | 0            | 0            | 10           | 17           |
| 8 μm clone 5         | 8            | 9            | 9            | 10           | 0            | 27           |
| 8 μm clone 6         | 20           | 17           | 19           | 17           | 27           | 0            |

**Figure S3. Chromosome copy number derived from whole exome sequencing (WES) data agrees with data of aCGH. Number of SNVs increase with migration, increasing the heterogeneity of the cell population. Variations in  $\Delta$ LOH is smallest for clones migrated through 8  $\mu$ m transwells. Related to Figure 4 and Figure 5.** (A) Chromosome copy number derived from whole exome sequencing (WES) data of control clone 1 agrees with the aCGH data in Figure 4C. Chromosome copy number from control clone 1 WES data was acquired by using CNVkit software package, compared against the computed “flat” diploid reference[S2], then the data were shifted up (by  $\log_2(0.3)$ ) such that the diploid regions of WES and aCGH agree with each other, i.e. chromosome 4q, 12q and 13. CNVkit is best for comparisons of two samples, where data shifting is not required, as done in Figure S4. (B,C) Considering the data from Figure 5, instead of comparing to Ctrl clone 1, the three clones of each group are compared to each other. As the cells migrate, SNVs between clones increase. Measurement noise is derived from technical controls from multiple arrays ( $n \geq 3$  clones per condition). (D) SNV heatmap showing pairwise comparisons of the different SNPa samples. Numbers in the heatmap indicate number of probes detected within the SNV pair comparison. Bulk samples and control clones have relatively low SNVs, indicative of a homogeneous population. Migrations through the 3  $\mu$ m transwells increase number of SNVs. (E,F,G) SNV confirmed changes in LOH’s (in Mb, see text or methods) of TW3 clones from experiment 1 (Figure 4E-H), 2 (Figure 5A-D) and 3 are listed as LOH gain, loss and total (gain+loss). Pairwise comparison of the clones are listed below row 3 of each heatmap. Most of the LOH gains are confirmed by SNV calls, but not LOH losses. LOH variations are lowest after 8  $\mu$ m migration.

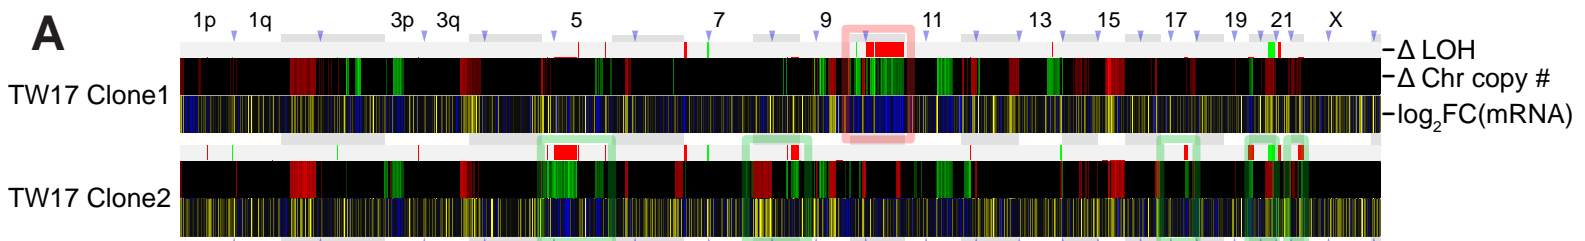

ΔChr copy # ( ■ SNP/ ◆ WES)    ● ΔLOH    △ log<sub>2</sub>FC(mRNA)    ▼ log<sub>2</sub>FC(mRNA) Top 10%

Δ LOH    Δ Chr copy #    log<sub>2</sub>FC(mRNA)

-1 0 1    -2 0 2    -2 0 2

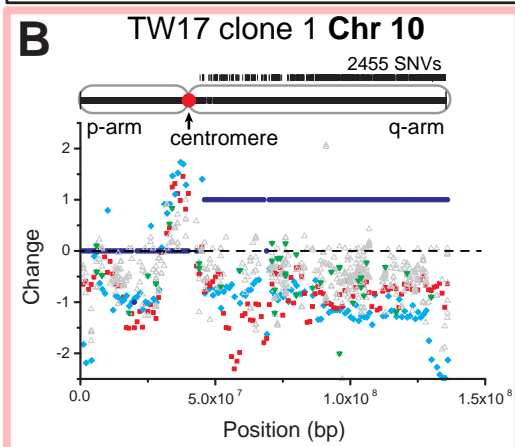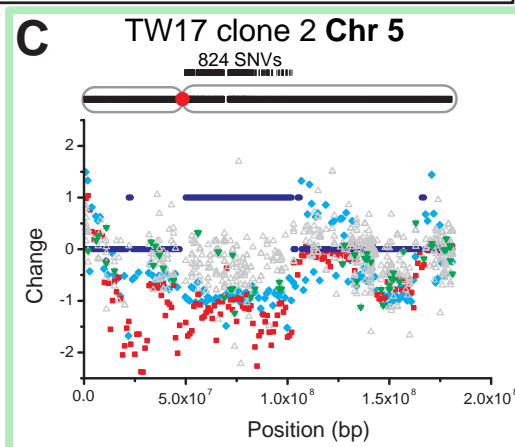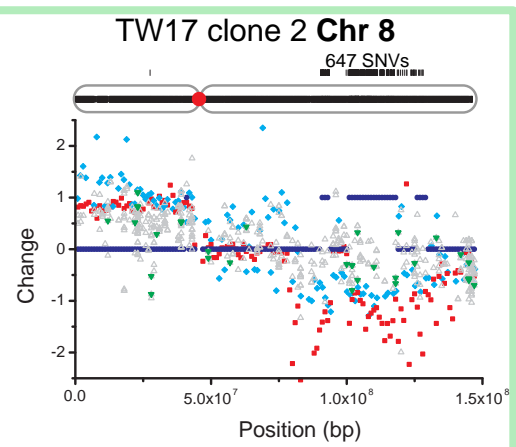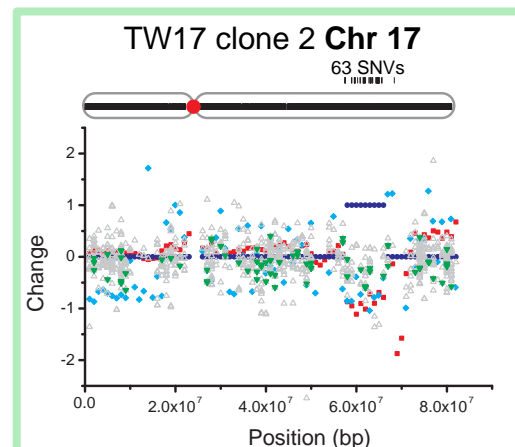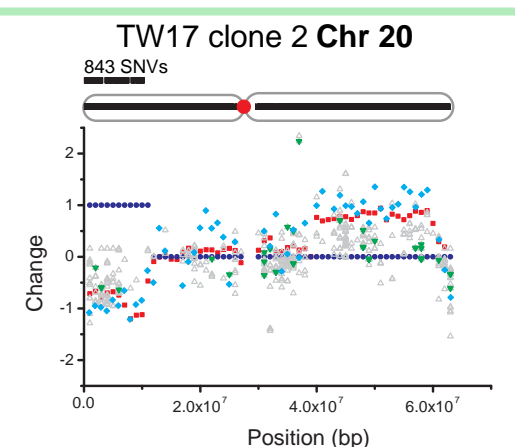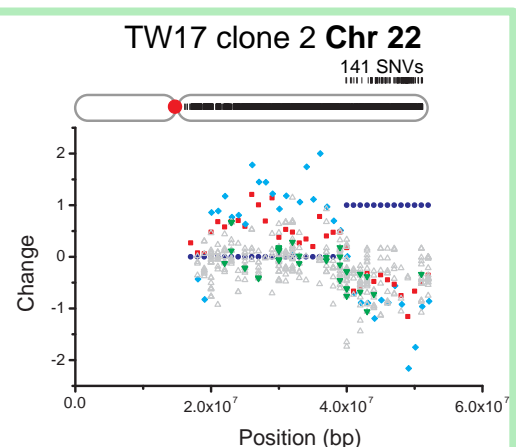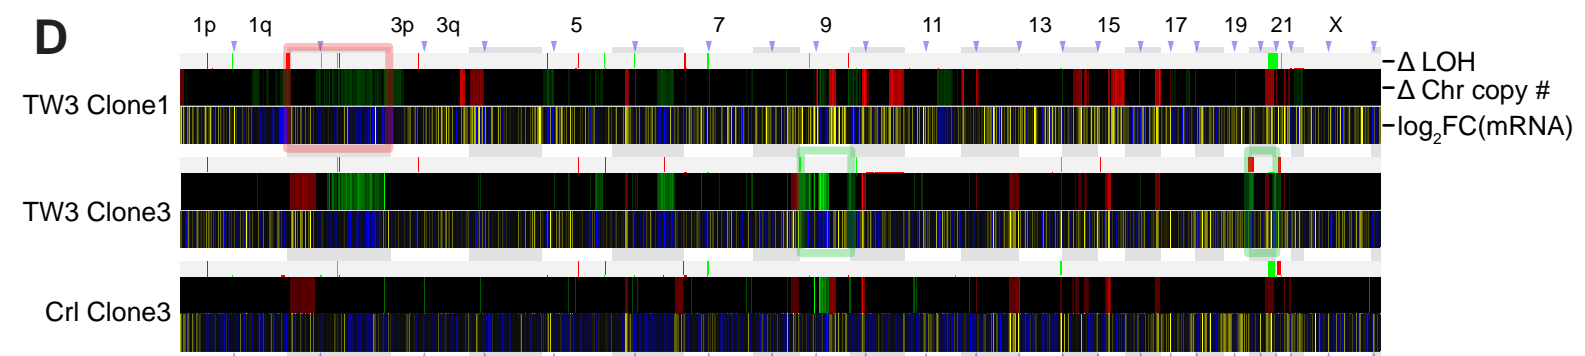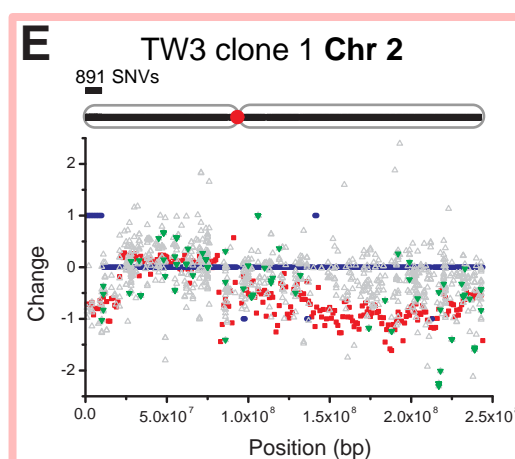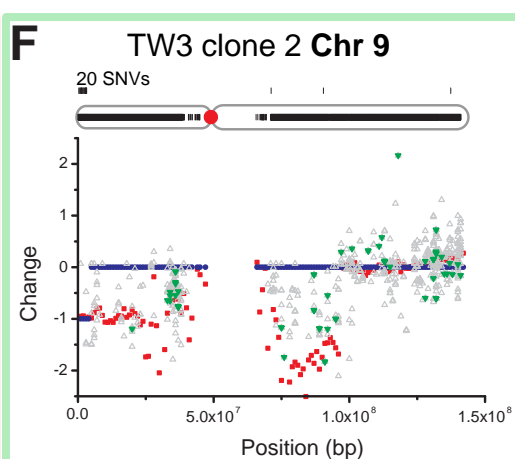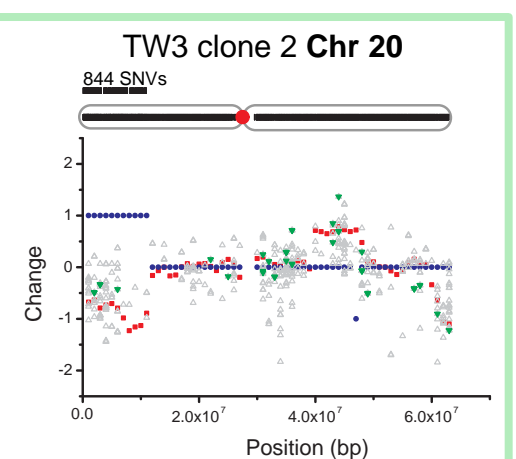

**Figure S4. mRNA,  $\Delta$ CN,  $\Delta$ LOH and SNVs data are consistent with each other, showing partial loss and gain of the chromosomes. Related to Figure 5. (A,D)** Change in LOH ( $\Delta$ LOH), change in chromosome copy number ( $\Delta$ Chr copy #) and log<sub>2</sub> of mRNA fold change (log<sub>2</sub>FC(mRNA)) heatmaps from the study involved in Figure 5. Although the samples here are subtracted by the data of Control clone 1, differences between samples are still observed and also increase with number of constricted migration, as shown in Figure 5 when samples were subtracted by pre-migration sample. Consistent patterns can be observed between  $\Delta$ Chr copy # and log<sub>2</sub>FC(mRNA), when a region gain chromosome copy number (red), it is often accompanied by an increase in mRNA levels (yellow), and vice versa. Compliment of Figure 5G. **(B,C,E,F)** Various chromosomal plots from the heatmaps in Figure S4A, providing a zoomed in plot of a given chromosome for  $\Delta$ Chr copy # from SNP array (SNPa) and whole exome sequencing (WES),  $\Delta$ LOH, SNVs and mRNA fold change. Black ticks on top of each plot indicate the SNPa probes location for a given chromosome, with reference to the centromere (red circle). SNVs are indicated as an upward shift of the ticks. The more reliable highly abundant transcripts (top 10% expressing mRNAs, green) also follow the  $\Delta$ Chr copy # pattern.



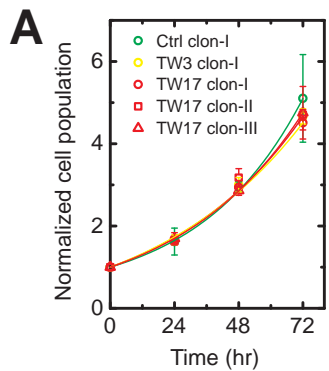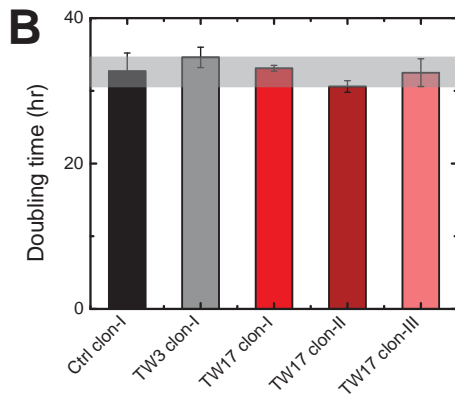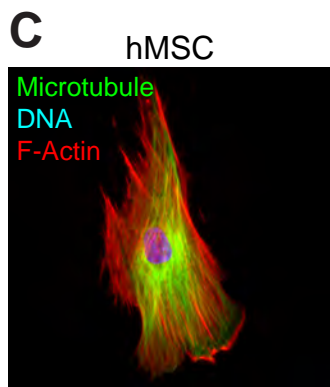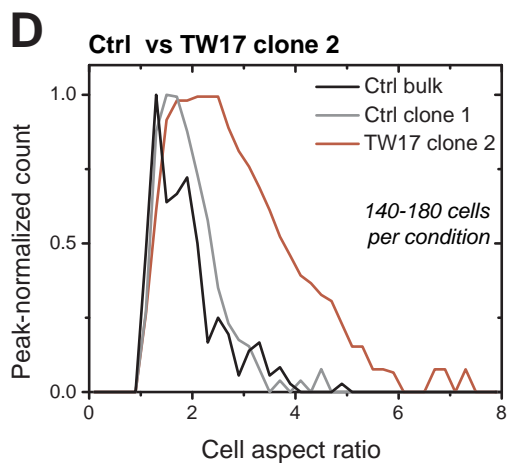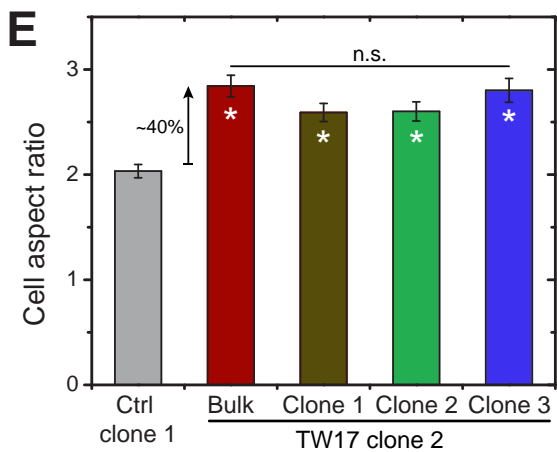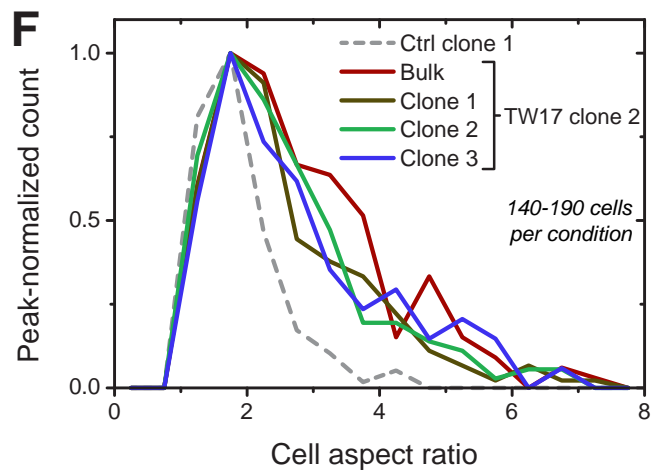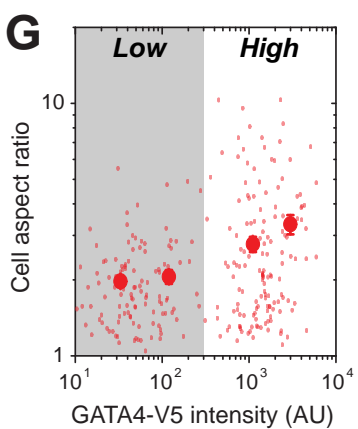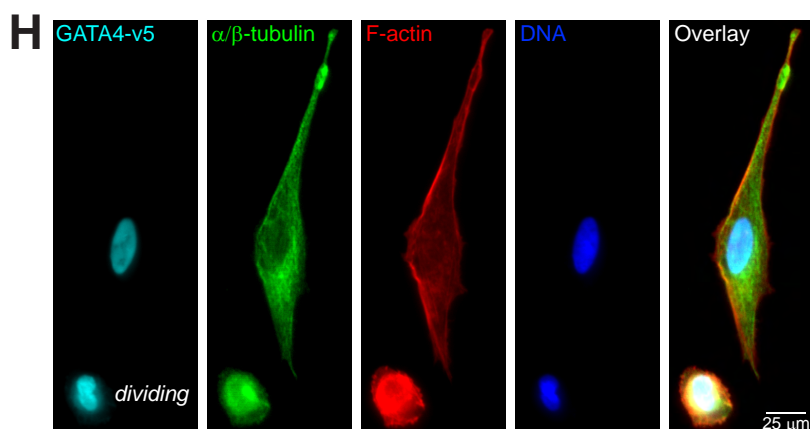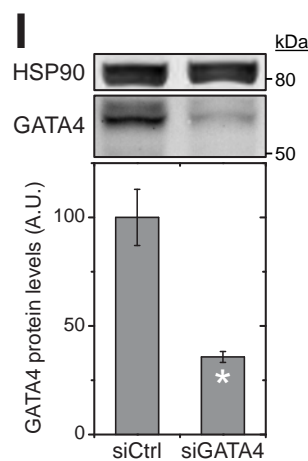

**Figure S5. Multiple constricted migration does not alter proliferation rate, but one of the migrated clone has altered cell morphology. The elongated morphology is driven by tubulin organization and GATA4, which can be depleted by siGATA4 treatment. Related to Figure 6. (A,B)** Proliferation rate and doubling time stay relatively constant between the non-migrated and migrated clones. **(C)** hMSC showing alignment of microtubule along the length of the cell, giving it an elongated cell morphology. **(D)** Cell aspect ratio distribution of Ctrl bulk, Ctrl clone 1 and TW17 clone 2, showing the shift to an elongated cell morphology for TW17 clone 2 ( $\geq 140$  cells per condition,  $n \geq 3$  expts,  $*p < 0.05$ ). **(E,F)** Single cell clones were isolated from TW17 clone 2 and their cell morphology were quantified from F-actin staining by phalloidin. Both averaged aspect ratio and distribution of the clones are similar to the bulk TW17 clone 2 ( $*p < 0.05$  compared to Ctrl clone 1). **(G)** Cell aspect ratio scatter plot of cells expressing GATA4-v5, showing an increase in aspect ratio with higher GATA4-v5 expression. **(H)** Highly spindle U2OS with the overexpression of GATA4-v5 has microtubules along the length of the cell, resemblance of hMSC in (C). **(I)** siGATA4 treatment on TW17 clone 2 cells leads to a decrease in GATA4 protein levels ( $n = 3$  western blots,  $*p < 0.05$  compared to siCtrl).

**Table S1.** Clonality of U2OS cultures as measured by comparative genome hybridization arrays, aCGH. Related to Figure 4 and 5, with additional information in Table S6.

| <b>Culture</b>  | <b>% clonality</b> |
|-----------------|--------------------|
| Control bulk    | 87.2%              |
| Control clone 1 | 95.2%              |
| TW3 clone 1     | 95.5%              |
| TW3 clone 2     | 100%               |
| TW3 clone 3     | 98.9%              |
| TW17 clone 1    | 100%               |
| TW17 clone 2    | 98.7%              |
| TW17 clone 3    | 100%               |

**Table S2.** Chromosome number estimates were derived from aCGH data for Control bulk and clone 1 sample in Figure 4B-C. Chromosome total length of each chromosome was calculated by adding the chromosome copy number calls of the corresponding chromosome. Chromosome number was estimated by dividing the chromosome total length by the 1 Mb windows of each chromosome, hence it is the average chromosome copy number call.

| <u>Control bulk</u> | <u>Chr</u>   | <u>Chr number estimate</u> | <u>Chr total length (Mb)</u> |
|---------------------|--------------|----------------------------|------------------------------|
|                     | 1            | 2.98                       | 682.29                       |
|                     | 2            | 3.21                       | 775.70                       |
|                     | 3            | 2.73                       | 534.71                       |
|                     | 4            | 2.51                       | 474.62                       |
|                     | 5            | 3.05                       | 542.07                       |
|                     | 6            | 2.70                       | 455.91                       |
|                     | 7            | 2.61                       | 411.85                       |
|                     | 8            | 3.50                       | 507.17                       |
|                     | 9            | 2.77                       | 340.80                       |
|                     | 10           | 3.24                       | 433.66                       |
|                     | 11           | 2.83                       | 375.79                       |
|                     | 12           | 2.75                       | 362.55                       |
|                     | 13           | 2.06                       | 199.71                       |
|                     | 14           | 2.87                       | 255.64                       |
|                     | 15           | 2.89                       | 240.01                       |
|                     | 16           | 2.88                       | 233.31                       |
|                     | 17           | 3.07                       | 245.94                       |
|                     | 18           | 2.65                       | 203.97                       |
|                     | 19           | 2.51                       | 145.45                       |
|                     | 20           | 3.13                       | 191.01                       |
|                     | 21           | 2.83                       | 102.04                       |
|                     | 22           | 4.29                       | 154.52                       |
|                     | X            | 1.57                       | 237.75                       |
|                     | <b>TOTAL</b> | <b>65.62</b>               | <b>8106.47</b>               |

  

| <u>Control clone 1</u> | <u>Chr</u>   | <u>Chr number estimate</u> | <u>Chr total length (Mb)</u> |
|------------------------|--------------|----------------------------|------------------------------|
|                        | 1            | 2.93                       | 669.83                       |
|                        | 2            | 3.05                       | 736.97                       |
|                        | 3            | 2.75                       | 538.69                       |
|                        | 4            | 2.56                       | 483.53                       |
|                        | 5            | 3.07                       | 546.90                       |
|                        | 6            | 2.61                       | 441.24                       |
|                        | 7            | 2.69                       | 425.22                       |
|                        | 8            | 3.21                       | 465.58                       |
|                        | 9            | 2.88                       | 354.05                       |
|                        | 10           | 3.24                       | 433.80                       |
|                        | 11           | 2.98                       | 395.74                       |
|                        | 12           | 2.61                       | 344.28                       |
|                        | 13           | 2.13                       | 206.20                       |
|                        | 14           | 2.77                       | 246.57                       |
|                        | 15           | 2.72                       | 225.35                       |
|                        | 16           | 2.83                       | 229.01                       |
|                        | 17           | 3.09                       | 247.32                       |
|                        | 18           | 2.66                       | 204.90                       |
|                        | 19           | 2.49                       | 144.16                       |
|                        | 20           | 2.98                       | 181.59                       |
|                        | 21           | 2.69                       | 96.84                        |
|                        | 22           | 4.30                       | 154.68                       |
|                        | X            | 1.55                       | 233.84                       |
|                        | <b>TOTAL</b> | <b>64.75</b>               | <b>8006.27</b>               |

**Table S4.** Counts taken from the chromosome copy number change against  $\log_2(\text{RNA ratio})$  plots shown in Figure 5G. **Only the data points above the 0.5 threshold**, for both changes, were taken into consideration. Relative percentage population of each sample for each quadrants of table S2A. For overall positive correlation, we combined the data as cluster 2 & 3 (C2, C4) versus cluster 1 & 4 (C1, C4), and calculated  $p = 3.15 \times 10^{-9}$ . Probability of the positive correlation between the chromosome copy number change against  $\log_2(\text{RNA ratio})$ , per counts. Probability of each cluster was calculated by  $0.5^{(\text{Count})}$  for the counts listed in upper table. The positive correlation p-value was calculated by  $(pC3/pC1) * (pC2/pC4)$ . Cluster 1, 2, 3 and 4 represent top left, top right, bottom left and bottom right quadrants of the plot.

| <b>Counts</b> | Ctrl Clone 1 | Ctrl Clone3 | TW3 Clone1 | TW3 Clone3 | TW17 Clone1 | TW17 Clone2 |
|---------------|--------------|-------------|------------|------------|-------------|-------------|
| Cluster1      | 26           | 20          | 71         | 64         | 60          | 101         |
| Cluster2      | 161          | 178         | 347        | 203        | 384         | 340         |
| Cluster3      | 108          | 164         | 302        | 294        | 246         | 220         |
| Cluster4      | 133          | 135         | 131        | 87         | 226         | 94          |
| TOTAL         | 428          | 497         | 851        | 648        | 916         | 755         |

#### **Percentage population**

|          |       |       |       |       |       |       |
|----------|-------|-------|-------|-------|-------|-------|
| Cluster1 | 6.1%  | 4.0%  | 8.3%  | 9.9%  | 6.6%  | 13.4% |
| Cluster2 | 37.6% | 35.8% | 40.8% | 31.3% | 41.9% | 45.0% |
| Cluster3 | 25.2% | 33.0% | 35.5% | 45.4% | 26.9% | 29.1% |
| Cluster4 | 31.1% | 27.2% | 15.4% | 13.4% | 24.7% | 12.5% |

#### **Probability**

|                              |         |         |          |          |          |          |
|------------------------------|---------|---------|----------|----------|----------|----------|
| pCluster1                    | 1.5E-08 | 9.5E-07 | 4.2E-22  | 5.4E-20  | 8.7E-19  | 3.9E-31  |
| pCluster2                    | 3.4E-49 | 2.6E-54 | 3.5E-105 | 7.8E-62  | 2.5E-116 | 4.5E-103 |
| pCluster3                    | 3.1E-33 | 4.3E-50 | 1.2E-91  | 3.1E-89  | 8.8E-75  | 5.9E-67  |
| pCluster4                    | 9.2E-41 | 2.3E-41 | 3.7E-40  | 6.5E-27  | 9.3E-69  | 5.0E-29  |
| Positive correlation p-value | 7.7E-34 | 5.1E-57 | 2.8E-135 | 7.0E-105 | 2.8E-104 | 1.3E-110 |

**Table S5.** Counts taken from the chromosome copy number change against  $\log_2(\text{RNA ratio})$  plots shown in Figure 5G. **All data points were taken into consideration.** Relative percentage population of each sample for each quadrants of table S2A. For overall positive correlation, we combined the data as cluster 2 & 3 (C2, C4) versus cluster 1 & 4 (C1, C4), and calculated  $p=0.008$ . Probability of the positive correlation between the chromosome copy number change against  $\log_2(\text{RNA ratio})$ , per counts. Probability of each cluster was calculated by  $0.5^{(\text{Count})}$  for the counts listed in upper table. The positive correlation p-value was calculated by  $(pC3/pC1)*(pC2/pC4)$ . Cluster 1, 2, 3 and 4 represent top left, top right, bottom left and bottom right quadrants of the plot.

| <b>Counts</b> | Ctrl Clone 1 | Ctrl Clone3 | TW3 Clone1 | TW3 Clone3 | TW17 Clone1 | TW17 Clone2 |
|---------------|--------------|-------------|------------|------------|-------------|-------------|
| Cluster1      | 96           | 125         | 174        | 275        | 162         | 388         |
| Cluster2      | 818          | 522         | 1007       | 684        | 863         | 873         |
| Cluster3      | 311          | 735         | 503        | 700        | 410         | 493         |
| Cluster4      | 1149         | 992         | 690        | 715        | 939         | 620         |
| TOTAL         | 2374         | 2374        | 2374       | 2374       | 2374        | 2374        |

**Percentage population**

|          |       |       |       |       |       |       |
|----------|-------|-------|-------|-------|-------|-------|
| Cluster1 | 4.0%  | 5.3%  | 7.3%  | 11.6% | 6.8%  | 16.3% |
| Cluster2 | 34.5% | 22.0% | 42.4% | 28.8% | 36.4% | 36.8% |
| Cluster3 | 13.1% | 31.0% | 21.2% | 29.5% | 17.3% | 20.8% |
| Cluster4 | 48.4% | 41.8% | 29.1% | 30.1% | 39.6% | 26.1% |

**Probability**

|                              |          |          |          |          |          |          |
|------------------------------|----------|----------|----------|----------|----------|----------|
| pCluster1                    | 1.3E-29  | 2.4E-38  | 4.2E-53  | 1.6E-83  | 1.7E-49  | 1.6E-117 |
| pCluster2                    | 5.7E-247 | 7.3E-158 | 7.3E-304 | 1.2E-206 | 1.6E-260 | 1.6E-263 |
| pCluster3                    | 2.4E-94  | 5.5E-222 | 3.8E-152 | 1.9E-211 | 3.8E-124 | 3.9E-149 |
| pCluster4                    | 9.3E-302 | 2.4E-299 | 1.9E-208 | 5.8E-216 | 2.2E-283 | 2.3E-187 |
| Positive correlation p-value | 1.2E-10  | 7.2E-43  | 3.4E-195 | 2.5E-119 | 1.7E-52  | 1.7E-108 |

**Table S6.** Results from array-CGH (Comparative Genome Hybridization) for control clone 1 of Figure 4C.

|                                                                                                                                                                                                                                                      |                                                                    |
|------------------------------------------------------------------------------------------------------------------------------------------------------------------------------------------------------------------------------------------------------|--------------------------------------------------------------------|
|                                                                                                                                                                     | <a href="http://www.dgenetics.com">www.dgenetics.com</a>           |
| 510 Chormany Drive • #254-255 • Madison, Wisconsin 53719 • 608-441-8160                                                                                                                                                                              |                                                                    |
| <b>CLG Microarray Test Results</b>                                                                                                                                                                                                                   |                                                                    |
| <b>Cell Line ID:</b> U2OS/Control-Clone1 p8 <b>Lab #:</b> CLG-21818 <b>Date received:</b> 11/6/15 <b>Date Reported:</b> 11/20/15                                                                                                                     |                                                                    |
| <b>Contact Person:</b> Jerome Irianto                                                                                                                                                                                                                | <b>PI:</b> D. Discher <b>Institute:</b> University of Pennsylvania |
| <b>Test Code:</b> aCGH 150 <b>Email:</b> iriantoj@seas.upenn.edu                                                                                                                                                                                     | <b>PO #:</b> 3473145                                               |
| <b>Mailing Address:</b> 129 Towne Building, 220 S. 33 <sup>rd</sup> St., Philadelphia, PA 19104                                                                                                                                                      |                                                                    |
| <hr/>                                                                                                                                                                                                                                                |                                                                    |
| <b>Sample Type:</b> Human Epithelial Frozen Culture <b>dsDNA Concentration:</b> 218ng/μl <b>Total dsDNA:</b> 3.2 μg                                                                                                                                  |                                                                    |
| <b>Sex:</b> Female <b>260/280 (1.7-1.9):</b> 1.8 <b>260/230 (≥1.90):</b> 2.2 <b>Array Type:</b> Agilent 180K Standard aCGH +SNP                                                                                                                      |                                                                    |
| <b>Array ID Number:</b> 252983030028_1_1 <b>Reference DNA:</b> Agilent Euro Female                                                                                                                                                                   |                                                                    |
| <hr/>                                                                                                                                                                                                                                                |                                                                    |
| <b>Quality Control</b>                                                                                                                                                                                                                               |                                                                    |
| A sufficient amount of high quality genomic DNA, as determined by UV spec. (NanoVue), fluorometer (Qubit) and Agarose Gel analysis, was extracted from cell line U2OS/Control-Clone1 p8 and passed our internal quality standards for aCGH labeling. |                                                                    |
| aCGH Probes (PASS/FAIL): Pass                                                                                                                                                                                                                        |                                                                    |
| SNP Probes (PASS/FAIL): Pass                                                                                                                                                                                                                         |                                                                    |
| Experimental Deviations: None                                                                                                                                                                                                                        |                                                                    |
| <b>Results:</b>                                                                                                                                                                                                                                      |                                                                    |
| Clonal Fraction: 95.17%                                                                                                                                                                                                                              |                                                                    |
| See attached sheets for Tabular and Graphical presentation of microarray results.                                                                                                                                                                    |                                                                    |
| Variants are considered provisional until confirmed by another technique. For further confirmation of a particular variant, CLG recommends using Karyotyping (variants >5Mb), FISH (variants >200Kb).                                                |                                                                    |

### **Supplemental References**

- S1. Irianto, J., Pfeifer, C.R., Bennett, R.R., Xia, Y., Ivanovska, I.L., Liu, A.J., Greenberg, R.A., and Discher, D.E. (2016). Nuclear constriction segregates mobile nuclear proteins away from chromatin. *Mol. Biol. Cell.* DOI: 10.1091/mbc.E16-06-0428
- S2. Talevich, E., Shain, A.H., Botton, T., and Bastian, B.C. (2016). CNVkit: Genome-Wide Copy Number Detection and Visualization from Targeted DNA Sequencing. *PLoS Comput. Biol.* 12, e1004873.
